# Supplementary material for: Forgiveness in human-machine interaction
Source: Frontiers journal article supplement (doi:10.3389/fcomp.2025.1617471), 2025-08-06
Supplement: Data_Sheet_1.docx [file Data_Sheet_1.docx]

**Appendix A**

**Participants’ demographic information and reported ICT use**

| Laptop use | Tablet use | Mobile phone use | Occupation | Education | Gender | Age | Name |
| --- | --- | --- | --- | --- | --- | --- | --- |
| 5 | 1 | 5 | Medical student | MA | Woman | 28 | Bar |
| 5 | 2 | 5 | Marketing | MA | Woman | 28 | Zofia |
| 5 | 2 | 5 | Medicine student | BA | Woman | 28 | Coral |
| 5 | 1 | 5 | Research coordinator | BA | Woman | 28 | Gaya |
| 5 | 1 | 5 | Kindergarten teacher | High school and certificates | Woman | 28 | Ora |
| 5 | 5 | 5 | Physician | PhD | Man | 30 | Herzel |
| 2 | 1 | 5 | Social work | BA | Woman | 28 | Avishag |
| 5 | 5 | 5 | High tech | BA | Man | 30 | Yaron |
| 5 | 1 | 5 | Academia | MA | Woman | 28 | Zoe |
| 4 | 2 | 5 | Independent | MA | Man | 31 | Tom |
| 1 | 1 | 5 | High tech | BA | Man | 28 | Meny |
| 5 | 1 | 5 | Independent | High school and certificates | Man | 30 | Yaniv |
| 5 | 1 | 5 | Marketing | BA | Woman | 29 | Talya |
| 3 | 1 | 5 | _ | High school | Man | 30 | Gavriel |
| 5 | 1 | 5 | High tech | High school | Man | 30 | Ran |
| 5 | 1 | 5 | High tech | BA | Man | 29 | Philip |
| 5 | 1 | 5 | High tech | BA | Man | 30 | Ariel |
| 5 | - | 5 | Sales | High school | Woman | 28 | Yahel |
| 4 | 1 | 4 | Lawyer | BA | Man | 30 | Noam |
| 3 | 1 | 5 | Bartender | High school and certificates | Man | 29 | Sam |
| 5 | 1 | 4 | High tech | BA | Woman | 29 | Shira |
| 5 | 3 | 5 | Independent | BA | Man | 50 | Rick |
| 5 | 1 | 5 | Academia | BA | Man | 34 | Ben |
| - | - | - | Teacher | MA | Woman | -- | Dalia |
| - | - | - | High tech | BA | Woman | -- | Ira |
| 4 | 1 | 5 | Research Support coordinator | BA | Woman | 41 | Michal |
| 5 | 1 | 5 | Academia | MA | Man | 44 | Manasseh |

*Note*. Pseudonyms. Values on the scales ranged from 1 (never use this device) to 5 (use this device all the time).
